# Supplementary material for: Serum Soluble Corin Deficiency Predicts Major Disability within 3 Months after Acute Stroke
Source: PubMed Central journal article supplement (PMC5033232; doi:10.1371/journal.pone.0163731), 2016-09-22
Supplement: pone.0163731.s001.pdf [file pone.0163731.s001.pdf]

**S1 Table.** Baseline characteristics of stroke patients in participants who were followed up and those who were lost of follow-up at the 3-month follow-up after stroke

| Characteristics                     | Followed up<br>(n=522) | Lost<br>(n=75)   | <i>P</i> -value* |
|-------------------------------------|------------------------|------------------|------------------|
| Age, mean±SD                        | 62.76±12.63            | 59.25±12.93      | 0.025            |
| Male, n (%)                         | 331 (63.41)            | 53 (70.67)       | 0.220            |
| Smoking,%                           | 209 (40.04)            | 36 (48.00)       | 0.190            |
| Drinking,%                          | 135 (25.86)            | 30 (40.00)       | 0.011            |
| Family history of stroke,%          | 114 (21.84)            | 14 (18.67)       | 0.531            |
| Hypertension, n (%)                 | 330 (63.22)            | 47 (62.67)       | 0.926            |
| Diabetes, n (%)                     | 115 (22.03)            | 13 (17.33)       | 0.354            |
| Coronary heart disease, n (%)       | 51 (9.77)              | 6 (8.00)         | 0.626            |
| Ischemic stroke, n (%)              | 423 (81.03)            | 58 (77.33)       | 0.449            |
| Body mass index, mean±SD            | 24.55±3.73             | 24.37±2.96       | 0.706            |
| Waist circumference, mean±SD        | 84.69±10.99            | 81.65±8.86       | 0.156            |
| Systolic blood pressure, mmHg       | 152.0±23.1             | 151.2±22.3       | 0.761            |
| Diastolic blood pressure, mmHg      | 87.9±14.5              | 91.9±14.4        | 0.026            |
| Hours from onset to hospitalization | 21 (12-33)             | 15 (4-34)        | 0.058            |
| Total cholesterol, mmol/L           | 4.90 (4.17-5.46)       | 5.02 (4.36-5.91) | 0.192            |
| Triglycerides, mmol/L               | 1.35 (0.99-1.87)       | 1.44 (1.12-1.98) | 0.492            |
| LDL-C, mmol/L                       | 3.04 (2.51-3.56)       | 2.94 (2.67-3.88) | 0.221            |
| HDL-C, mmol/L                       | 1.12 (0.94-1.34)       | 1.14 (1.01-1.38) | 0.301            |
| Fasting plasma glucose, mmol/L      | 6.2 (5.3-7.6)          | 6.1 (5.5-7.3)    | 0.983            |
| Baseline NIHSS score, points        | 4 (2-8)                | 5 (2-7)          | 0.624            |
| Serum soluble corin, pg/ml          | 1684 (1305-2077)       | 1618 (1215-2033) | 0.915            |

All values are expressed with median (inter-quartile range) unless otherwise noted. HDL-C: high density lipoprotein cholesterol; LDL-C: low density lipoprotein cholesterol; NIHSS: the National Institutes of Health Stroke Scale.

\*Calculated using student t-test for mean, Kruskal-Wallis test for median, and Chi-square test for percentage.
